# Supplementary material for: Novel CuI/tributyl phosphine catalyst system for amination of aryl chloridesElectronic supplementary information (ESI) available: experimental and analytical details (G.C. and NMR analysis). See http://www.rsc.org/suppdata/cc/b3/b308034j/
Source: Royal Society of Chemistry journal article supplement (doi:10.1039/b308034j), 2003-01-01
Supplement: b308034j.doc [file b308034j.doc]

Supplementary data

Experimental Procedure involving aryl chlorides.

Amination reaction was carried out in a 50 ml capacity high-pressure autoclave (Parr Instruments, USA). Solvent toluene (23 ml) was charged to the reactor followed by aryl amine (7.85 mmol), aryl halide (16.48 mmol), CuI (0.28 mmol), ligand (0.56 mmol) and base (23.5 mmol). The reactor was flushed twice with nitrogen to ensure removal of air. The autoclave was then stirred and heated to 135 oC and the reaction was continued for 10.5 hours. After cooling to room temperature, the reaction solution was filtered to remove the precipitated base and washed with toluene few times. Solution was concentrated to obtain crude product, which was chromatographed to obtain pure products. the products separated, were characterized by IR and NMR analysis and compared with authentic samples by GC analysis whenever possible.

b) Experimental Procedure involving aryl Iodides:

The experimental procedure for aryl iodides was same as that for the aryl chlorides, except that the reaction was carried out at 110 oC in a 50 ml round bottom flask under nitrogen blanket. The reaction was continued for 3.5 hours.

1) GC Analysis Details:

Hewlett Packard GC: Model HP6890(*with auto sampler*)

Column Used for Analysis: Capillary Column, HP 19091J-413

Method:

1. Oven: 1) Initial temperature: 80oC (on)

2) Initial time: 5.00 min

3) Ramps: 30.00oC/min

4) Final temperature: 280oC

5) Final time: 2.00min

1. Injector
   1. Mode: Split
   2. Initial temperature: 250oC (on)
   3. Pressure: 8.00 psi (on)
   4. Split ratio: 50: 1
   5. Split flow: 69.4 ml/min
   6. Total flow: 73.4ml/min
   7. Gas type: Helium

1. Column: Capillary column
   1. Model No.: Hp 19091J-413

HP-5; 5% phenyl methylsiloxane

- 1. Maximum temperature: 325oC
  2. Length: 30.00 meter
  3. Diameter: 320.00m
  4. Film thickness: 0.25m
  5. Mode: Constant pressure
  6. Pressure: 8.00 psi
  7. Initial flow: 1.4 ml/min
  8. Average velocity: 26 cm/sec

1. Detector (FID)
   1. Temperature: 250oC
   2. Hydrogen flow: 35.0 ml/min (on)
   3. Air flow: 300.00 ml/min (0n)
   4. Mode: Constant makeup flow

2)

1HNMR spectral data:

Bruker 300 MHz NMR spectrophotometer

1HNMR (300 MHz, CdCl3) δ 7.67 (t, 2H), 7.51 (d, 2H), 7.42 (t, 1H)

2)

1HNMR (CDCl3, 300 MHz); δ 7.76-7.64 (m, 4H), 7.53 (d, 4H), 7.38 (t, 2H), 6.16 (bs, 1H, NH)

3)

1HNMR (CDCl3, 300 MHz); δ 7.32 (t, 6H), 7.07 (m,6H), 3.7 (s, 3H), (t, 6H)

4)

1HNMR (CDCl3, 300 MHz); δ 7.01 (ddd, 2H), 6.63 (dd,6H), 6.51(ddd, 6H), 6.36 (dd, 4H), 6.45(dd, 2H), 3.72 (s, 6H-CH3).

5)

1HNMR (CDCl3, 300 MHz); δ 6.52 (m, 6H), 6.35 (m, 6H), 3.72(s, 9H-CH3)

6)

1HNMR (CDCl3, 300 MHz); δ 7.02 (dd, 2H), 6.83 (dd, 1H), 6.46 (dd, 2H), 6.81 (dd, 1H), 6.50 (dd, 1H), 6.34 (dd, 1H), 6.62 (dd, 1H), 2.33 (s, 3H-CH3), 4.1 (bs, N-H).

7)

1HNMR (CDCl3, 300 MHz); δ 7.01 (dd, 2H), 6.62 (dd, 1H), 6.46 (dd, 2H), 6.33 (dd, 2H), 6.51 (dd, 2H), 3.73 (s, 3H-CH3), 3.9 (bs, 1H, NH)

8)

1HNMR (CDCl3, 300 MHz); δ 6.51 (dd, 4H), 6.34 (dd, 4H), 3.74 (s, 6H-CH3), 4.1 (bs, 1H, NH)

9)

1HNMR (CDCl3, 300 MHz); δ 7.01 (tt, 2H), 6.62 (dd, 1H), 6.46 (dd, 2H), 6.81 (dd, 2H), 6.50 (dd, 2H), 6.34 (dd, 2H), 6.82 (dd, 2H), 2.35 (s, 6H- CH3)
